# Supplementary material for: Bayesian inference and comparison of stochastic transcription elongation models
Source: PLOS journal article supplement (doi:10.1371/journal.pcbi.1006717), 2020-02-14
Supplement: S4 (10.1371/journal.pcbi.1006717.s004) [file journal.pcbi.1006717.s004]

## S4 Appendix: Prior distributions

### Prior for $\Delta G_{\tau}^{\ddagger}$ , which governs the rates of translocation

RNAP/pol II: to select a prior for  $\Delta G_{\tau}^{\ddagger}$  we simulated transcription on the *rpoB* gene under Model 3 – the simplest binding equilibrium model.  $\Delta G_{\tau}^{\ddagger}$  and  $k_{cat}$  were sampled uniformly from a relevant range, with  $K_D$  held constant at  $100 \mu M$  and  $[NTP] = 1000 \mu M$ . For each simulation, the mean elongation velocity was calculated. The results are displayed in S1 Fig.

This plot shows that as the energy barrier of translocation ( $\Delta G_{\tau}^{\ddagger}$ ) increases, the velocity decreases. If  $\Delta G_{\tau}^{\ddagger} \gtrsim 8 k_B T$  then it becomes impossible to achieve a realistic mean velocity, providing a relatively clear upper bound on this parameter. If  $\Delta G_{\tau}^{\ddagger} \lesssim 3 k_B T$  then translocation becomes very rapid and the same distribution of velocities is obtained in simulations, irrespective of the exact value of  $\Delta G_{\tau}^{\ddagger}$ . In this case catalysis becomes strongly rate-limiting, and it would be appropriate to apply a partial equilibrium approximation to the translocation step. This provides an effective lower bound for parameter  $\Delta G_{\tau}^{\ddagger}$ . Therefore we centered our prior distribution for  $\Delta G_{\tau}^{\ddagger}$  in this interval (a normal distribution with a mean of 5.5 and a standard deviation of 0.97, so that the central 99% interval is (3, 8)).

T7 pol: the same analysis was performed, however with  $\Delta G_{\tau}^{\ddagger}$  at its prior mean of  $-3.3 k_B T$  (S1 Fig).

### Prior for $k_{bind}$ , which governs the rate of NTP binding

To select a prior for  $k_{bind}$  we performed similar simulations, but instead used Model 2 – the simplest kinetic binding model.  $k_{bind}$  and  $k_{cat}$  were sampled uniformly from relevant ranges,  $K_D$  was set to  $100 \mu M$  and  $[NTP] = 1000 \mu M$ . (S1 Fig).

Depending on the exact value of  $k_{cat}$ , if  $k_{bind} \lesssim 0.1 \mu M^{-1} s^{-1}$ , then it is impossible to achieve a realistic velocity, providing a relatively clear lower bound on this parameter. If  $k_{bind} \gtrsim 5 \mu M^{-1} s^{-1}$  then binding becomes very rapid and the same distribution of velocities is obtained in simulations, irrespective of the exact value of  $k_{bind}$ . Again this is because catalysis becomes strongly rate limiting in this region, and it would be appropriate to apply a partial equilibrium approximation to the binding step. Hence we centered our (lognormal) prior around the interval (0.01, 5) – the conservatively selected bounds reflecting that the experimental data has been collected at differing

NTP concentrations, altering the rate. Performing the same analysis with different parameters gave us a similar prior.

## Prior distribution related to rate of NTP release

A model is non-identifiable if two or more parameterisations can produce the same output. Our preliminary results suggested non-identifiability between  $\frac{k_{rel}}{k_{bind}}$  and  $k_{bind}$  (S1 Fig). When  $k_{bind}$  is low (and hence binding is rate-limiting), there is an approximately linear relationship between  $\frac{k_{rel}}{k_{bind}}$  and  $k_{bind}$ . As  $k_{bind}$  increases from 0, the dissociation constant  $\frac{k_{rel}}{k_{bind}}$  must also increase in order for the system to achieve the same velocity. However, as binding comes closer to achieving equilibrium,  $\frac{k_{rel}}{k_{bind}}$  converges. Most previous estimates of  $K_D$  have assumed binding to be at equilibrium. This assumption restrains the values which  $K_D$  may take, and subsequently estimates for  $K_D$  are typically in the order of  $10^1 - 10^2 \mu\text{M}$ . However for a model in which binding is slow it is expected that estimates of  $\frac{k_{rel}}{k_{bind}}$  can be lower. This has indeed been demonstrated by Mejia et al. 2015 [1] who estimated  $\frac{k_{rel}}{k_{bind}}$  to be  $0.6 \mu\text{M}$ . Therefore the prior distribution for  $\frac{k_{rel}}{k_{bind}}$  must permit both of these binding models to be tested fairly during Bayesian inference. We centered our lognormal prior for  $\frac{k_{rel}}{k_{bind}}$  around a very broad range, with a central 95% interval of (0.2, 200).

It is noted that selecting a prior distribution which does not discriminate between the kinetic and equilibrium binding models *a priori* may not be plausible.

## References

- [1] Mejia YX, Nudler E, Bustamante C. Trigger loop folding determines transcription rate of Escherichia coli’s RNA polymerase. Proceedings of the National Academy of Sciences. 2015;112(3):743–748.
